# Supplementary material
Source: PubMed Central journal article supplement (PMC5997246)
Supplement: NIHMS969380-supplement-Online_Resource_Table_2.pdf [file NIHMS969380-supplement-Online_Resource_Table_2.pdf]

**Table S2: Original and updated filters for mosaic variants**

| <b>Parameter</b>                          | <b>Original filters</b> | <b>Updated filters</b> |
|-------------------------------------------|-------------------------|------------------------|
| Child depth minimum                       | 10                      | 30                     |
| Alternate allele frequency (AAF) in child | 0.15 – 0.35             | 0.15 – 0.35            |
| Alternate allele depth in child           | 3                       | 6                      |
| Parent depth                              | 20 - 80                 | 25 - 80                |

---
