# Supplementary material
Source: PubMed Central journal article supplement (PMC5997246)

Figure S2

### DIR 15 fraction distribution for WES PCGC cases and SSC controls

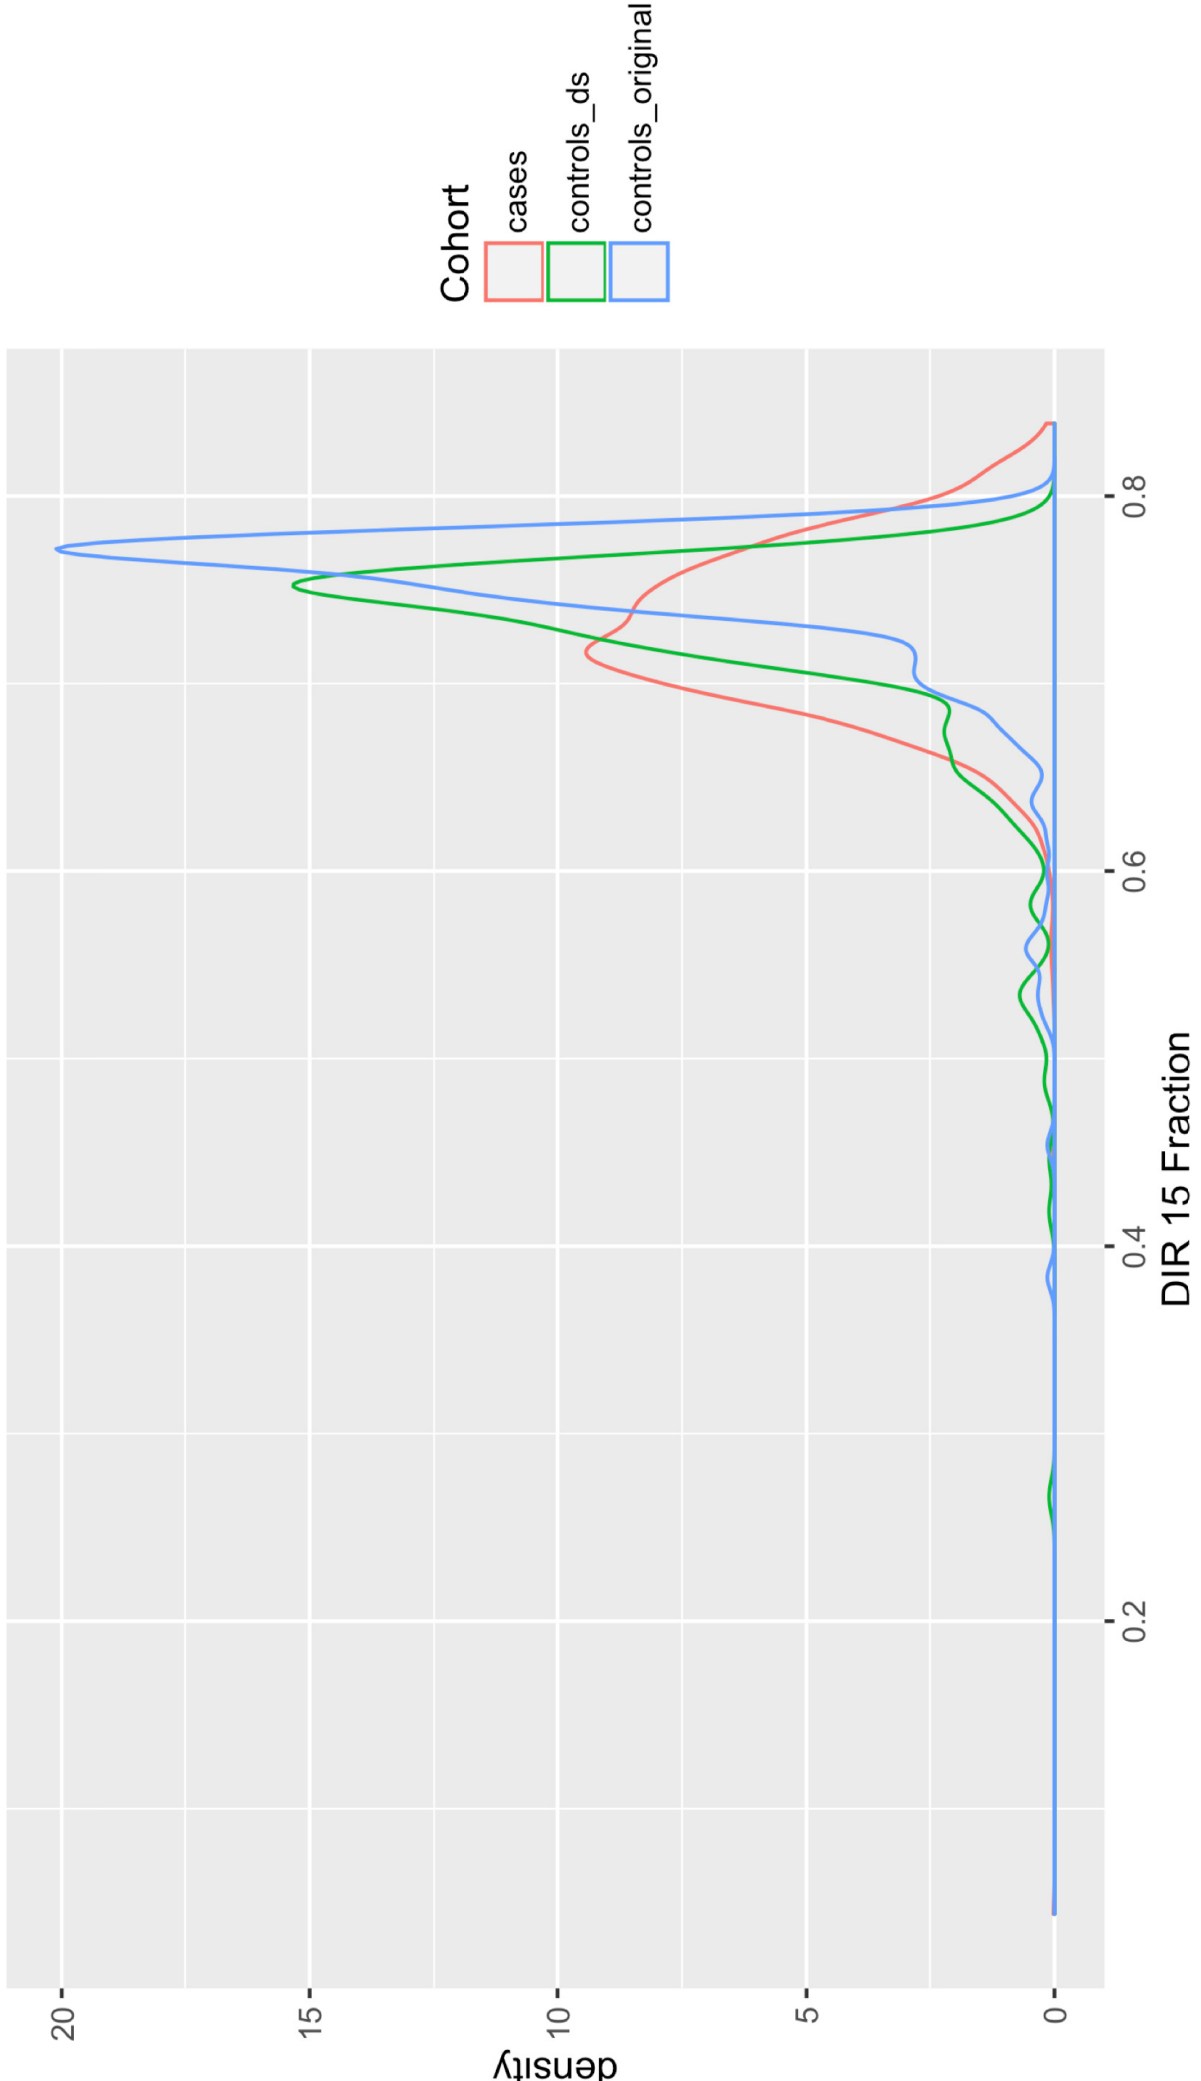

Supplement: NIHMS969380-supplement-Online_Resource_Figure_2.pdf [file NIHMS969380-supplement-Online_Resource_Figure_2.pdf]
